# Supplementary material for: Peptide-modified conducting polymer as a biofunctional surface: monitoring of cell adhesion and proliferation
Source: Royal Society of Chemistry journal article supplement (doi:10.1039/c4ra08481k), 2014-01-01
Supplement: c4ra08481k1.pdf [file c4ra08481k1.pdf]

## Peptide Modified Conducting Polymer as Biofunctional Surface: Monitoring of Cell Adhesion and Proliferation

G. Oyman, C. Geyik, R. Ayranci, M. Ak, D. Odaci Demirkol, S. Timur, and H. Coskunol

### Supplementary Information

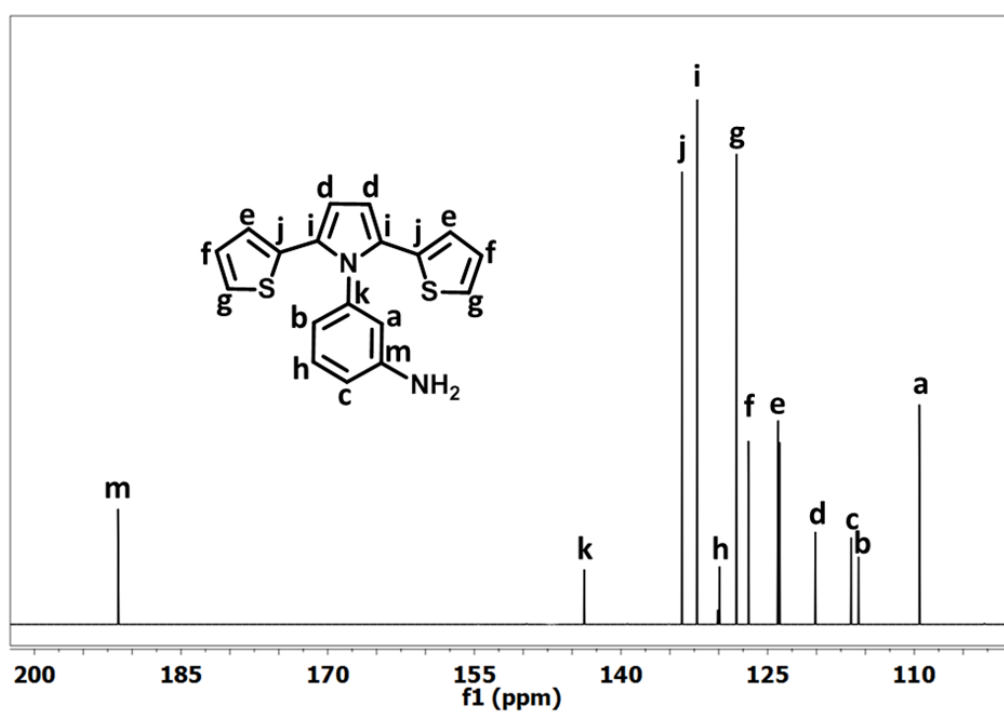

Fig. S1.  $^{13}\text{C}$ -NMR spectra of SNS- $\text{mNH}_2$  monomer.

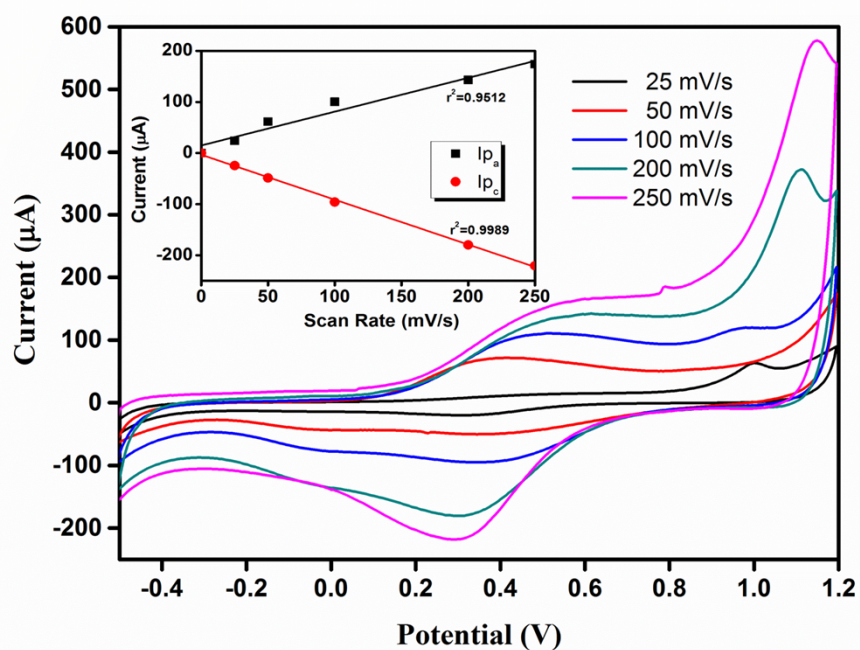

**Fig. S2.** Cyclic voltammograms of poly-(SNS-mNH<sub>2</sub>) at different scan rates in monomer free electrolyte. Inset figure shows peak current vs scan rate graph.

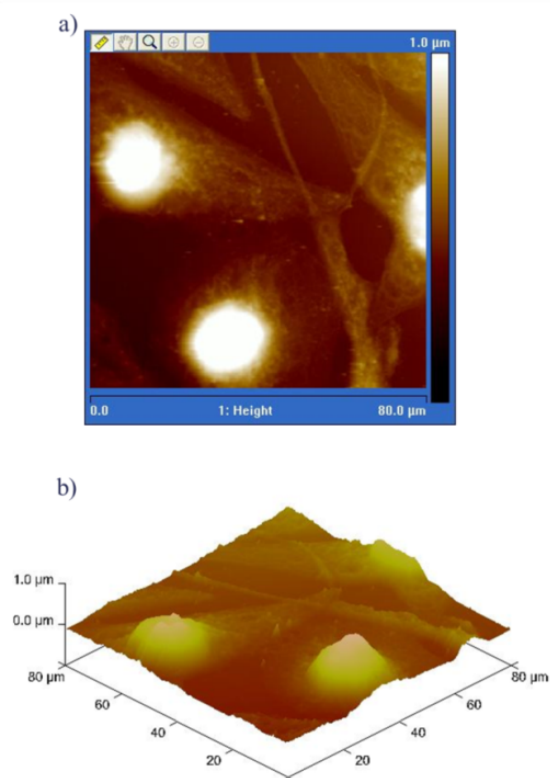

**Fig. S3.** (a) 2D and (b) 3D topographic AFM height images of Vero cell morphology after 72 h incubation ITO/SNS-mNH<sub>2</sub>/RGD surface.

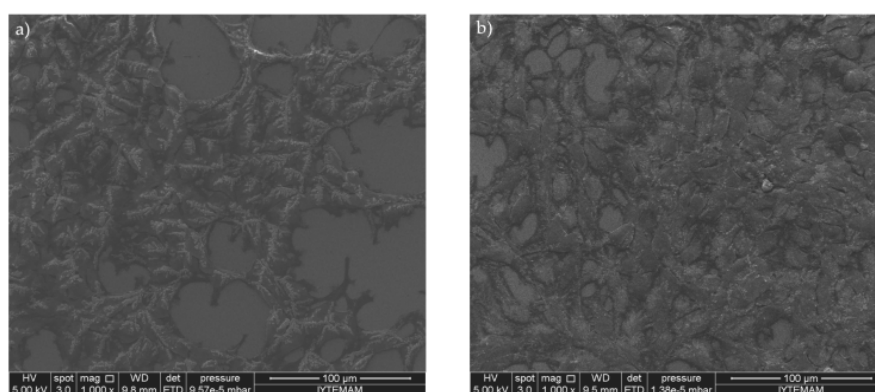

**Fig. S4.** Proliferation behavior of SH-SY5Y cell line on (a) ITO/SNS-mNH<sub>2</sub> and (b) ITO/SNS-mNH<sub>2</sub>/RGD surfaces was examined by SEM.
